# Supplementary material for: Functional characterization of Lilium lancifolium cold-responsive Zinc Finger Homeodomain (ZFHD) gene in abscisic acid and osmotic stress tolerance
Source: PubMed Central journal article supplement (PMC8162235; doi:10.7717/peerj.11508), 2021-05-25
Supplement: peerj-09-11508-s001.pdf [file peerj-09-11508-s001.pdf]

1 ATGGATCTCCCCATTTATCAAGGGGATATCCATGACAACCACAAC  
M D L P I Y Q G D I H D N H N  
46 AAAAGTGGGGCGGGCGGGCGGTGAAGTACAAGGAGTGCCTGAAG  
K S G A A A A V K Y K E C L K  
91 AACCATGCAGCCACCATTGGAGTCATTGCCATTGATGGGTGTGGG  
N H A A T I G V I A I D G C G  
136 GAGTTCATGCCGAGTGGGGAGGAGGGCACACTGGAGGCCCTTAGA  
E F M P S G E E G T L E A L R  
181 TGCTCAGCCTGCGGCTGCCACCGAACTTCCACAGAAAAGAGACT  
C S A C G C H R N F H R K E T  
226 GAAGGAGAGGCTTCATCGTGTGGGTGCTCCACAAGCTCTTGCA  
E G E A S S C G C S H K L L S  
271 CCGCACCATATGATCATGCCCTTGGCCCTGCAGGCCTCGGAGCCA  
P H H M I M P L A L Q A S E P  
316 TTTGGCATGGTGAGGAAGAGATTCAGGACCAAGTTCACGCCGGGG  
F G M V R K R F R T K F T P G  
361 CAGAAGGAGAAGATGCTAGGGTTTGCTGAAAGAGTTGGATGGAAG  
Q K E K M L G F A E R V G W K  
406 ATGCAGAGGCTGGATGAGGGTGTGGTGCAGCAGTTCTGTCAGGAG  
M Q R L D E G V V Q Q F C Q E  
451 GTTGGGGTGAAGAGGAGGGTGTCAAGGTTTGGATGCACAACAAC  
V G V K R R V L K V W M H N N  
496 AAGCAGAATTTGGCAAAAAGGATCCATTGCAGAGTGACTIONACTGA  
K Q N L A K K D P L Q S D Y \*
