# Supplementary material for: Functional characterization of Lilium lancifolium cold-responsive Zinc Finger Homeodomain (ZFHD) gene in abscisic acid and osmotic stress tolerance
Source: PubMed Central journal article supplement (PMC8162235; doi:10.7717/peerj.11508), 2021-05-25
Supplement: peerj-09-11508-s002.pdf [file peerj-09-11508-s002.pdf]

-781 GCTTGATATC GAATTCGCGT GTCGCCCTTA CTATAGGGCA CGCGTGGTCG ACGGCCCGGG  
-721 CTGGTATTGA GCCATTTGTT TAATTATTCA AGATTTACAA CAACAACAAA AATTAAATCC  
-661 TTTAACTTAT GAAACACTTT AAATTTCTCT GTTCATTAAT CCAGCCAAGA CCATTCCCTT  
-601 ATCTCCCTTT CTCTGCCCAC TATGGTGTCC CCTCTCTACT GCCATAGCCT ATAAGCTTCT  
-541 TATTAAGGGG CTCACCAACA CAACCATGCA CCCCAAATGA CTCAAATTCA AGCCCTTCTC  
-481 TCTCTCAGTT TCATCTTCTT CCCATTGTAA CCACCTTTTA AACCTTCATC CTGCCATGAA  
-421 ATGCAACACT GAAGAATAGT TAAACTTTCC ATTTTCCCCC TGCACTTCCT TCATCCCTCG  
-361 GCACTCCTCG AAGAGACCTA ATTACTGTTT GACCCTAGCA GCCACCCCA CCATTCTCTT  
-301 TCTATCCCTC TCTAACAACC TAAGACGGAT GTGAAATTGG CTTTATTGTG TTGTTCTCTG  
-241 TTGGTTTTCT CTCCTCACCT AAGATAAGGT TATCTAGTTC CTTAGAGGTT CCAAATTTTT  
-181 CCACAGCCTC AAAGCAAAAC AAAAATCTCG CAAGTGGCTT GGTGTTGTT TTATTTAGTG  
-121 TCCAAAAAAA TCTGACCCAA ATTCCATTCG ATAATTTCCCT GTAGTTTGCG TGGTCTAATT  
-61 CTCTCCATTT TCCCTTTTTT CTTTTAGTCT CCAATAAAAT AAAAAGGATC CTAAATTGAG  
-1 AATG
