# Supplementary material for: Functional characterization of Lilium lancifolium cold-responsive Zinc Finger Homeodomain (ZFHD) gene in abscisic acid and osmotic stress tolerance
Source: PubMed Central journal article supplement (PMC8162235; doi:10.7717/peerj.11508), 2021-05-25

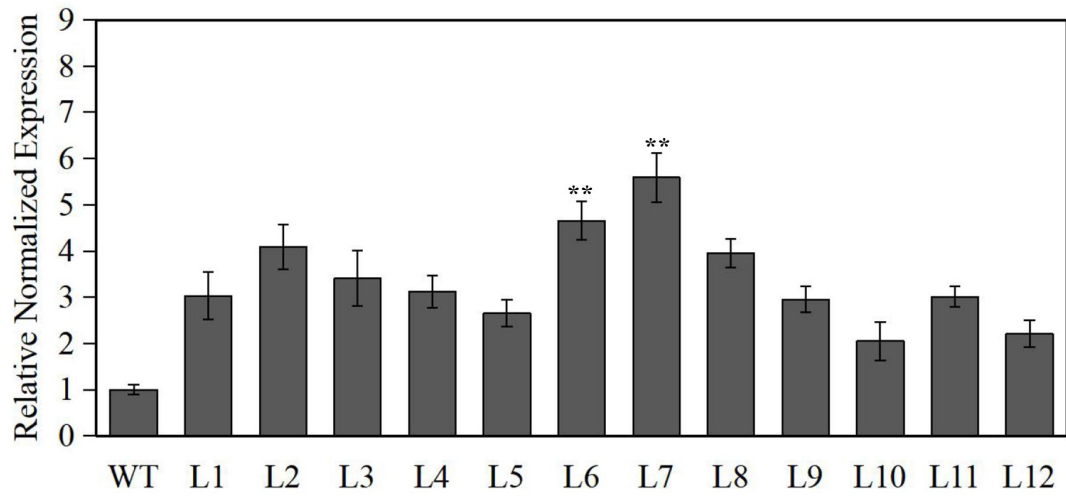

Supplement: peerj-09-11508-s003.pdf [file peerj-09-11508-s003.pdf]
