# Supplementary material for: Functional characterization of Lilium lancifolium cold-responsive Zinc Finger Homeodomain (ZFHD) gene in abscisic acid and osmotic stress tolerance
Source: PeerJ. 2021 May 25;9:e11508. doi: 10.7717/peerj.11508 (PMC8162235; doi:10.7717/peerj.11508)
Supplement: Supplemental Information 5 — Relative expression levels of LlZFHD4 normalized against levels of LlTIP1 as calculated by qRT-PCR (mean ±SD of three biological replicates). [file peerj-09-11508-s005.xlsx]

## Sheet: Sheet1
Figure4A_raw_data
	Leaf	Bulb	Bulb root	Stem root	Stem	Flower petal
Relative Normalized Expression	1	2.79089	0.73001	1.2048	1.64081	3.12864
±SD	0.10267	0.169727	0.039207	0.40999	0.310309	0.64275
Figure4B_raw_data
ABA	0hr	1hr	3hr	6hr	12hr	24hr
Relative Normalized Expression	0.88631	3.59118	1.04114	0.74954	1.22552	5.4682
±SD	0.1756	0.30821	0.35876	0.24913	0.07381	0.90631
Figure4C_raw_data
4℃	0hr	1hr	3hr	6hr	12hr	24hr
Relative Normalized Expression	0.13753	0.9153	0.9153	0.18076	0.55538	5.8892
±SD	0.01001	0.1003	0.06677	0.02316	0.03253	0.70146
Figure4D_raw_data
Drought	0hr	1hr	3hr	6hr	12hr	24hr
Relative Normalized Expression	0.13834	0.88861	0.09313	0.23373	0.90342	5.6581
±SD	0.10267	0.38416	0.06726	0.20441	0.03142	0.15472
Figure4E_raw_data
NaCl	0hr	1hr	3hr	6hr	12hr	24hr
Relative Normalized Expression	0.22964	2.19966	0.36536	1.62475	1.73134	1.80566
±SD	0.01738	0.29741	0.09713	0.42493	0.13987	0.29758
