# Supplementary material for: Functional characterization of Lilium lancifolium cold-responsive Zinc Finger Homeodomain (ZFHD) gene in abscisic acid and osmotic stress tolerance
Source: PeerJ. 2021 May 25;9:e11508. doi: 10.7717/peerj.11508 (PMC8162235; doi:10.7717/peerj.11508)
Supplement: Supplemental Information 6 — Relative expression levels of GUS normalized against levels of Atactin as calculated by qRT-PCR (mean ±SD of three biological replicates). [file peerj-09-11508-s006.xlsx]

## Sheet: Sheet1
Figure5A_raw_data
4℃	0hr	2hr	6hr	12hr	24hr
Relative Normalized Expression	0.55229	2.22361	1.08591	7.34465	0.67521
±SD	0.10561	0.60447	0.32902	0.80062	0.15452
Figure5B_raw_data
Drought	0hr	2hr	6hr	12hr	24hr
Relative Normalized Expression	0.55229	1.71875	2.02893	5.41891	0.89212
±SD	0.10561	0.70136	0.47183	0.59245	0.21878
Figure5C_raw_data
NaCl	0hr	2hr	6hr	12hr	24hr
Relative Normalized Expression	0.55229	4.32227	3.36707	5.30447	1.66116
±SD	0.10561	0.40984	0.30152	0.76393	0.24754
Figure5D_raw_data
ABA	0hr	2hr	6hr	12hr	24hr
Relative Normalized Expression	0.55229	3.81526	4.21181	7.23918	0.50446
±SD	0.10561	0.30406	0.8745	0.42876	0.13742
