# Supplementary material for: Functional characterization of Lilium lancifolium cold-responsive Zinc Finger Homeodomain (ZFHD) gene in abscisic acid and osmotic stress tolerance
Source: PeerJ. 2021 May 25;9:e11508. doi: 10.7717/peerj.11508 (PMC8162235; doi:10.7717/peerj.11508)
Supplement: Supplemental Information 7 [file peerj-09-11508-s007.xlsx]

## Sheet: Sheet1
Figure7C_raw_data
	soluble sugar content (mM/L)
	CK
	line	three repeated test			mean	±SD
	WT	0.29307	0.21065	0.12837	0.210697	0.08235
	L6	0.172434	0.200253	0.144763	0.172483	0.027745
	L7	0.157591	0.182117	0.206607	0.182105	0.024508
	4℃
	line	three repeated test			mean	±SD
	WT	0.895987	1.02135	0.770661	0.896	0.125346
	L6	1.21241	1.32073	1.10412	1.21242	0.108309
	L7	0.921255	1.103	1.01211	1.01212	0.0908725
	16.1%PEG
	line	three repeated test			mean	±SD
	WT	0.661207	0.794285	0.927408	0.7943	0.133101
	L6	0.841276	0.95849	1.07573	0.9585	0.117229
	L7	1.02122	1.13846	0.90401	1.02123	0.117227
Figure7D_raw_data
	relative electrolyte leakage (%)
	CK
	line	three repeated test			mean	±SD
	WT	8.4074	10.4074	6.40742	8.40741	2
	L6	14.4813	10.233	12.3571	12.3571	2.12412
	L7	10.351	12.3623	8.33976	10.351	2.01125
	4℃
	line	three repeated test			mean	±SD
	WT	10.351	12.3623	8.33976	10.351	2.01125
	L6	74.1082	79.8312	85.5542	79.8312	5.723
	L7	65.1209	70.9454	59.2964	65.1209	5.8245
	16.1%PEG
	line	three repeated test			mean	±SD
	WT	90.235	94.1762	86.2938	90.235	3.94123
	L6	79.6454	74.2134	68.7814	74.2134	5.432
	L7	69.89	76.9113	62.8687	69.89	7.02132
Figure7E_raw_data
	water loss rate(%)
line	Hours after treatment	three repeated test			mean	±SD
WT	0	0	0	0	0	0
	0.5	37.6339	35.1139	32.5939	35.1139	2.51999
	1	47.7088	49.7957	45.6221	47.7089	2.08681
	1.5	51.141	55.3147	53.2278	53.2278	2.08681
	2	56.1914	59.1504	57.6709	57.6709	1.47951
	2.5	62.9139	65.101	60.7269	62.9139	2.18703
	3	61.8157	64.4177	67.0197	64.4177	2.60198
line	Hours after treatment	three repeated test			mean	±SD
L6	0	0	0	0	0	0
	0.5	37.5266	39.5565	35.4967	37.5266	2.02987
	1	48.2914	51.311	49.8012	49.8012	1.50982
	1.5	52.026	54.5168	57.0077	54.5168	2.49087
	2	62.6841	59.6743	56.6645	59.6743	3.00981
	2.5	61.9078	66.1094	64.0086	64.0086	2.10081
	3	65.8783	63.378	68.3786	65.8783	2.50029
line	Hours after treatment	three repeated test			mean	±SD
L7	0	0	0	0	0	0
	0.5	41.9358	43.4545	44.9733	43.4545	1.51874
	1	49.7069	52.8939	56.081	52.8939	3.18704
	1.5	55.876	60.0634	57.9697	57.9697	2.09374
	2	63.3939	65.5916	61.1963	63.3939	2.19764
	2.5	69.9269	67.4727	65.0185	67.4727	2.45419
	3	66.8945	69.8121	72.7298	69.8121	2.91764
