# Supplementary material for: Functional characterization of Lilium lancifolium cold-responsive Zinc Finger Homeodomain (ZFHD) gene in abscisic acid and osmotic stress tolerance
Source: PeerJ. 2021 May 25;9:e11508. doi: 10.7717/peerj.11508 (PMC8162235; doi:10.7717/peerj.11508)
Supplement: Supplemental Information 8 — qRT-PCR was performed on the Arabidopsis AtRD29A, AtRD20, AtGolS1, AtLEA14, AtAPX2 and AtRD29B genes. The reference gene Atactin (NM_112764) was used as an internal reference gene. The expression level of WT samples was set as 1. [file peerj-09-11508-s008.xlsx]

## Sheet: Sheet1
Figure8_raw_data
		WT	L6	L7
AtCOR47	Relative Normalized Expression	1	1.22054	1.92054
	±SD	0.17671	0.02595	0.08259
AtGSTF6	Relative Normalized Expression	1	0.24892	0.58921
	±SD	0.17373	0.00975	0.07751
AtRD20	Relative Normalized Expression	1	16.7339	14.7205
	±SD	0.19754	2.87461	2.04615
AtRD29A	Relative Normalized Expression	1	30.8005	25.1398
	±SD	0.50221	4.28562	4.06286
AtRD29B	Relative Normalized Expression	1	21.7199	24.5203
	±SD	0.32478	2.5182	3.8481
AtAPX2	Relative Normalized Expression	1	31.0618	26.3538
	±SD	0.15208	4.2618	3.74043
AtGolS1	Relative Normalized Expression	1	9.23852	7.2991
	±SD	0.10861	0.78214	1.32908
AtLEA14	Relative Normalized Expression	1	21.2618	25.3538
	±SD	0.74072	3.46187	4.01876
